# Supplementary material
Source: publisher figshare collection journal article supplement (https://acs.figshare.com/ndownloader/files/4204795)
Supplement: Supplementary file 1 [file 4204795]

**Probing Side Chain Dynamics in Proteins by the Measurement of Nine Deuterium Relaxation  
Rates Per Methyl Group**

Xinli Liao,<sup>†,‡</sup> Dong Long,<sup>§</sup> Da-Wei Li,<sup>§</sup> Rafael Brüschweiler,<sup>§</sup> and Vitali Tugarinov<sup>‡,\*</sup>

<sup>†</sup>*Department of Chemistry and Biochemistry, University of Maryland, College Park, Maryland 20742, and*  
<sup>§</sup>*Chemical Sciences Laboratory, Department of Chemistry and Biochemistry and the National High Magnetic  
Field Laboratory, Florida State University, Tallahassee, Florida 32306*

**Simulations of  $R_2(\text{CHD}_2)$  Decay in  $(^{13}\text{CH})\text{D}_2$  Methyl Groups.** Relaxation of  $^2\text{H}$  single-quantum transitions in  $(^{13}\text{CH})\text{D}_2$  methyl groups  $\rho_{i-j}$  (Figure 2 of the main text) can be conveniently represented in the following form,

$$\frac{d}{dT} \begin{bmatrix} \rho_{1-2} \\ \rho_{2-3} \\ \rho_{3-4} \\ \rho_{4-5} \\ \rho_{5-6} \\ \rho_{6-7} \end{bmatrix} = -\left(\frac{1}{80}\right)(2\pi QCC)^2 \left[ \begin{aligned} & \begin{pmatrix} 9 & 0 & 0 & 0 & 0 & 0 \\ 0 & 9 & 0 & 0 & 0 & 0 \\ 0 & 0 & 9 & 0 & 0 & 0 \\ 0 & 0 & 0 & 9 & 0 & 0 \\ 0 & 0 & 0 & 0 & 9 & 0 \\ 0 & 0 & 0 & 0 & 0 & 9 \end{pmatrix} J^A(0) + \begin{pmatrix} 15 & -\sqrt{6} & 0 & 0 & 3\sqrt{2} & 0 \\ -\sqrt{6} & 19 & 1 & 0 & 0 & -3\sqrt{3} \\ 0 & 1 & 19 & -\sqrt{6} & 3\sqrt{3} & 0 \\ 0 & 0 & -\sqrt{6} & 15 & 0 & 3\sqrt{2} \\ 3\sqrt{2} & 0 & 3\sqrt{3} & 0 & 15 & 3 \\ 0 & -3\sqrt{3} & 0 & 3\sqrt{2} & 3 & 15 \end{pmatrix} J^A(\omega_D) \\ & + \begin{pmatrix} 6 & -\sqrt{6} & 0 & 0 & -3\sqrt{2} & 0 \\ -\sqrt{6} & -2 & 1 & 0 & 0 & 3\sqrt{3} \\ 0 & 1 & -2 & -\sqrt{6} & 3\sqrt{3} & 0 \\ 0 & 0 & -\sqrt{6} & 6 & 0 & -3\sqrt{2} \\ -3\sqrt{2} & 0 & 3\sqrt{3} & 0 & -6 & 3 \\ 0 & 3\sqrt{3} & 0 & -3\sqrt{2} & 3 & -6 \end{pmatrix} J^C(\omega_D) \\ & + \begin{pmatrix} 18 & 0 & -2\sqrt{6} & 0 & 0 & -6\sqrt{2} \\ 0 & 10 & 0 & -2\sqrt{6} & 0 & 0 \\ -2\sqrt{6} & 0 & 10 & 0 & 0 & 0 \\ 0 & -2\sqrt{6} & 0 & 18 & -6\sqrt{2} & 0 \\ 0 & 0 & 0 & -6\sqrt{2} & 18 & 0 \\ -6\sqrt{2} & 0 & 0 & 0 & 0 & 18 \end{pmatrix} J^A(2\omega_D) \\ & + \begin{pmatrix} 0 & 0 & -2\sqrt{6} & 0 & 0 & 6\sqrt{2} \\ 0 & 4 & 0 & -2\sqrt{6} & 0 & 0 \\ -2\sqrt{6} & 0 & 4 & 0 & 0 & 0 \\ 0 & -2\sqrt{6} & 0 & 0 & 6\sqrt{2} & 0 \\ 0 & 0 & 0 & 6\sqrt{2} & -12 & 0 \\ 6\sqrt{2} & 0 & 0 & 0 & 0 & -12 \end{pmatrix} J^C(2\omega_D) \end{aligned} \right] \begin{bmatrix} \rho_{1-2} \\ \rho_{2-3} \\ \rho_{3-4} \\ \rho_{4-5} \\ \rho_{5-6} \\ \rho_{6-7} \end{bmatrix}$$

where  $QCC=(e^2qQ/h)$  is a quadrupolar coupling constant (167 kHz<sup>1</sup>) and  $J(\omega)$  is the spectral density function,<sup>2-4</sup>

$$J(\omega) = \frac{1}{9} S_{axis}^2 \left( \frac{\tau_c}{1 + (\omega\tau_c)^2} \right) + \left( P_2(\cos\alpha) - \frac{1}{9} S_{axis}^2 \right) \frac{\tau_e}{1 + (\omega\tau_e)^2} \quad (\text{S1})$$

where  $S_{axis}^2$  is the generalized order parameter of the methyl 3-fold symmetry axis;  $P_2 = (1/2)[3\cos^2(x)-1]$ ;  $\alpha=0^\circ$  and  $P_2(\cos\alpha) = 1$  for the auto-correlation spectral density function,  $J^A(\omega)$ , while  $\alpha = 109.5^\circ$  and  $P_2(\cos\alpha) = -1/3$

for the quadrupolar cross-correlation spectral density,  $J^C(\omega)$ ;  $\tau_c$  is the (isotropic) correlation time of overall molecular re-orientation;  $1/\tau_e = 1/\tau_f + 1/\tau_c$  where  $\tau_f$  is the correlation time of fast local motions.

Simulations of the transverse magnetization decay in ( $^{13}\text{CH}$ )D<sub>2</sub> groups,  $R_2(\text{CHD}_2)$ , have been performed using the matrix exponential of the matrices in eqs S1 expanded to include the triple-quantum (3Q) terms present during relaxation delay  $T$ ,  $(\rho_{1-4}^{3Q} + \rho_{2-5}^{3Q})$  (see expression 5 of the main text). The following initial conditions for  $\rho_{i,j}$  have been used:

$$\rho(0) = (1/9) \left[ \sqrt{F_1} \rho_{1-2}; \sqrt{F_2} \rho_{2-3}; \sqrt{F_2} \rho_{3-4}; \sqrt{F_1} \rho_{4-5}; \sqrt{F_3} \rho_{5-6}; \sqrt{F_3} \rho_{6-7}; \sqrt{F_{3Q}} (\rho_{1-4}^{3Q} + \rho_{2-5}^{3Q}) \right]^T, \text{ where}$$

$F_i$  is the ‘out-and-back’ transfer function of each individual transition in the experiment of Figure 1 of the main text, and superscript  $T$  denotes the transposition operation. From expression (5) of the main text it follows that:

$$F_1 = 0.25 \left[ 2 \sin(4\pi J_{CD} T_C) + \sin(8\pi J_{CD} T_C) \right]^2 \quad (\text{S2a})$$

$$F_2 = 1.5 \sin^2(8\pi J_{CD} T_C) \quad (\text{S2b})$$

$$F_3 = 2 \sin^2(4\pi J_{CD} T_C) \quad (\text{S2c})$$

$$F_{3Q} = \left[ 0.5 \sin(8\pi J_{CD} T_C) - \sin(4\pi J_{CD} T_C) \right]^2 \quad (\text{S2d})$$

The sum of all transfer functions in eqs S2 above gives  $4 \sin^2(4\pi J_{CD} T_C) + 2 \sin^2(8\pi J_{CD} T_C)$  - the transfer function used for the sum of *all* transitions relaxing during the delay  $T$  in the experiment for  $R_2(\text{CHD}_2)$  measurement (Figure 1, inset A). To account for the differential transfer efficiency of  $\rho_{i,j}$  in the reverse pathway of the scheme, after the relaxation period  $T$  each of the transitions has been pre-multiplied by its corresponding  $\sqrt{F_i}$  before summation. Note the scaling of  $\rho(0)$  as above ensures that the sum of all transitions at  $T = 0$  is normalized to unity.

Thus simulated  $R_2(\text{CHD}_2)$  decays have been fitted to a single-exponential function  $I = I_0 \exp(-RT)$ , where  $I$  is the simulated intensity and  $R$  is the relaxation rate. The results of these simulations expressed as relative errors in  $R_2(\text{CHD}_2)$  arising from non-single-exponential decay at higher frequencies,  $100 * R_2(\text{CHD}_2) - R(D_+, \text{CH}_2\text{D}) / R(D_+, \text{CH}_2\text{D})$ , are illustrated in Figure 4 of the main text for several global molecular correlation times.

**Figure S1**

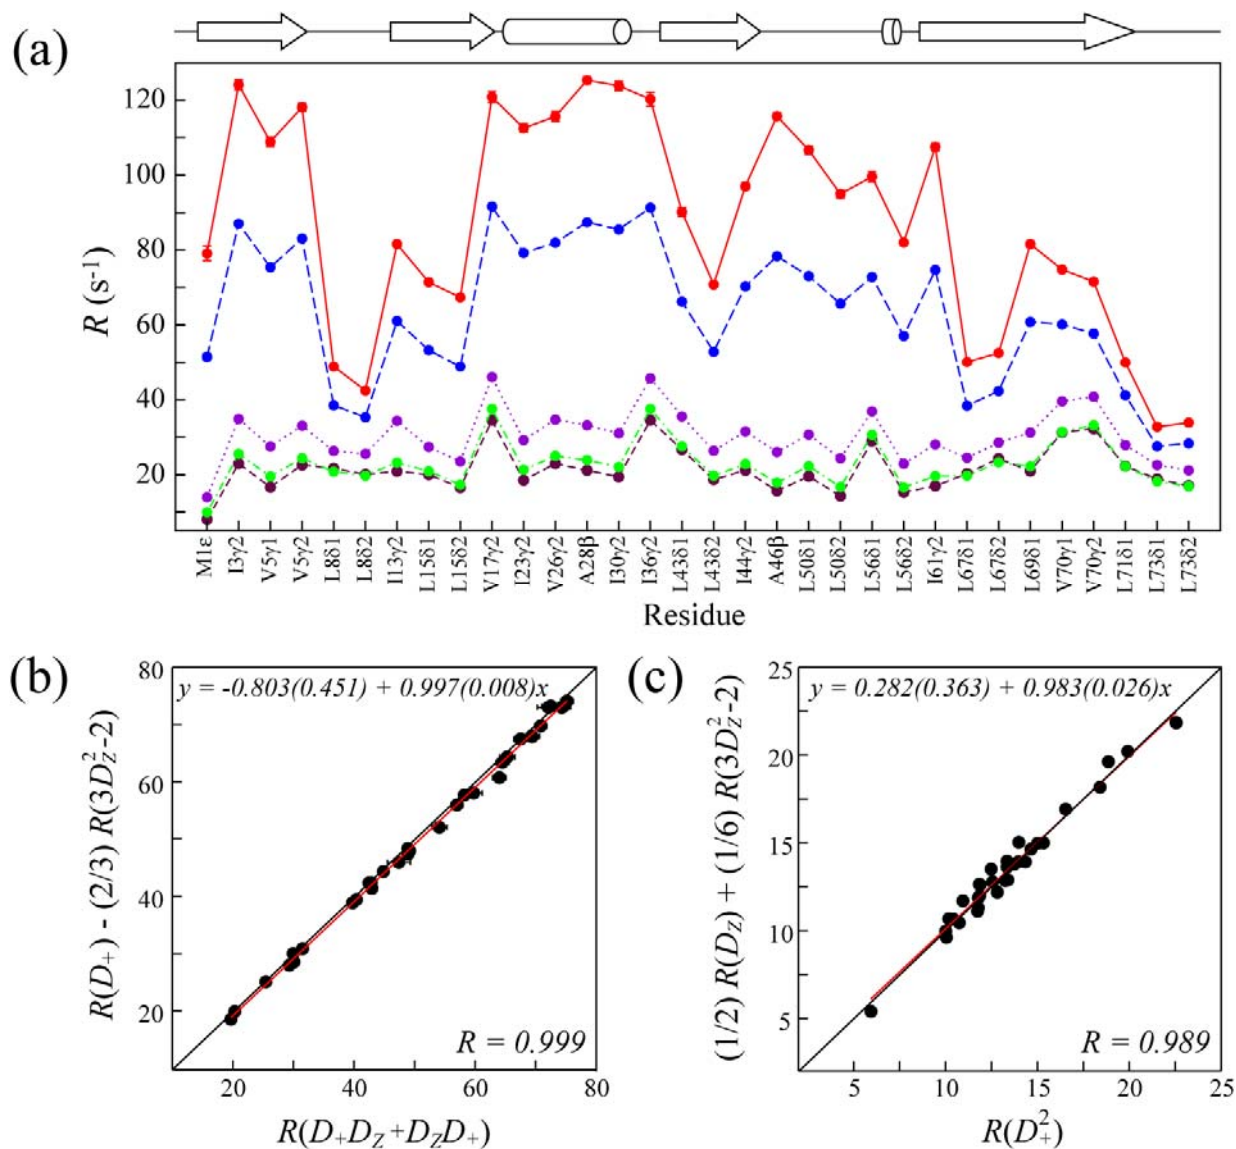

**Figure S1.** (a) All <sup>2</sup>H relaxation rates measured in <sup>13</sup>CH<sub>2</sub>D methyl groups of ubiquitin at 27 °C satisfy the consistency relations. (a)  $(5/3)R(D_+D_z + D_zD_+) \geq R(D_+) \geq (5/3)R(3D_z^2-2) \geq (5/3)R(D_+^2) \geq R(D_z)$ . The rates  $(5/3)R(D_+D_z + D_zD_+)$ ,  $(5/3)R(D_+)$ ,  $R(3D_z^2-2)$ ,  $(5/3)R(D_+^2)$  and  $R(D_z)$  are shown with red, blue, purple, green and brown circles/lines, respectively, vs. methyl positions; (b-c) Linear correlation plots of (b)  $R(D_+D_z + D_zD_+)$  rates (x-axis) vs.  $R(D_+) - (2/3)R(3D_z^2-2)$  (y-axis), and (c)  $R(D_+^2)$  (x-axis) vs.  $(1/2)R(D_z) + (1/6)R(3D_z^2-2)$  (y-axis) for 32 methyl groups in ubiquitin.

**Figure S2**

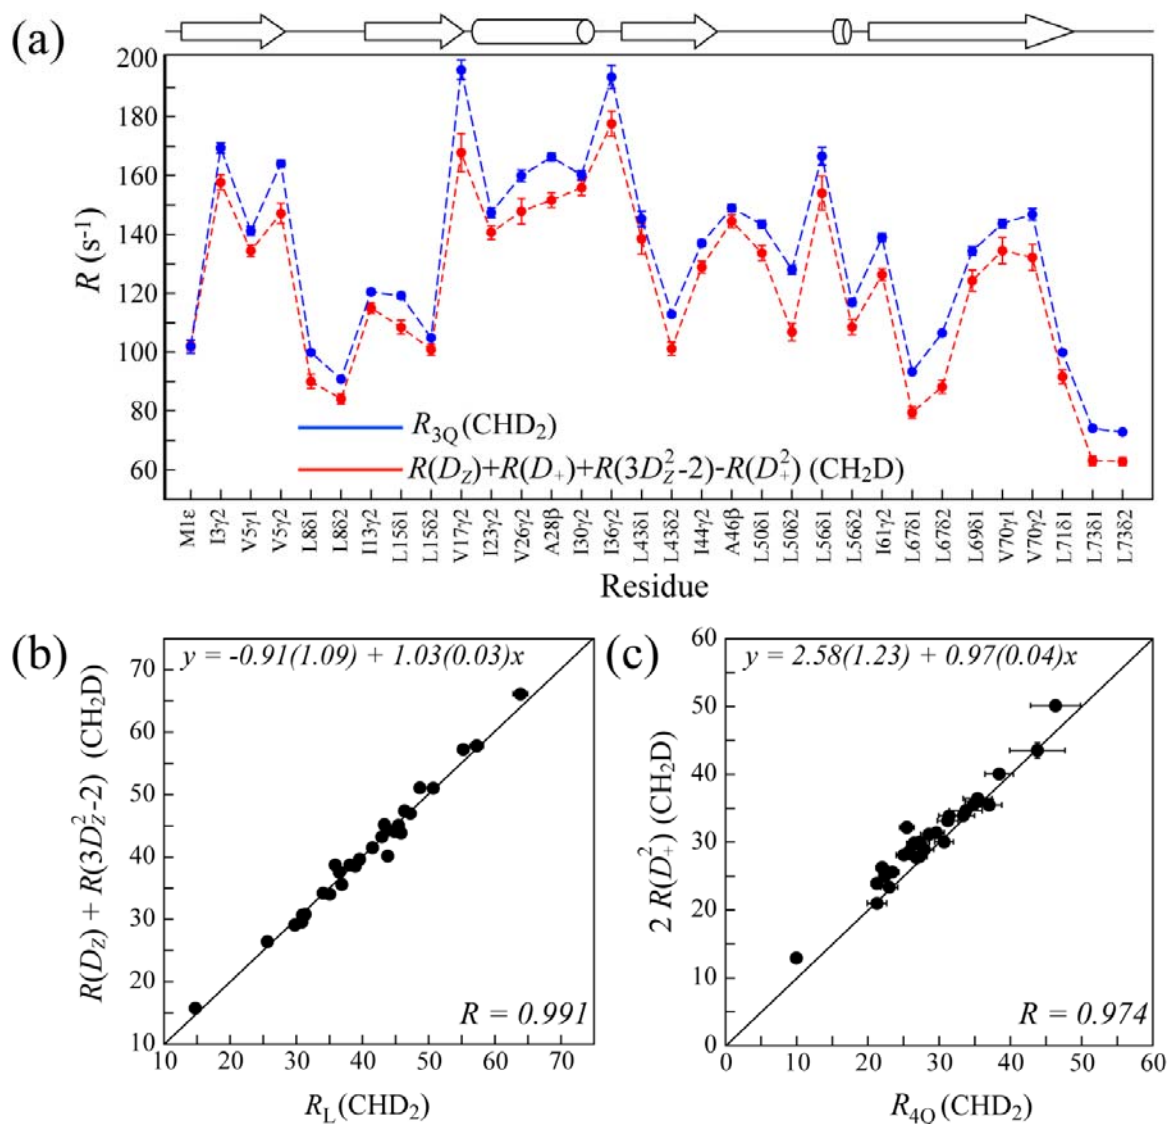

**Figure S2.** (a) All <sup>2</sup>H relaxation rates measured in <sup>13</sup>CHD<sub>2</sub> methyl groups of ubiquitin at 10 °C satisfy the consistency relations. (a)  $R_{3Q}(\text{CHD}_2) \leq R(D_Z) + R(D_+) + R(3D_Z^2 - 2) - R(D_+^2)$  (CH<sub>2</sub>D) (shown with red and blue circles/lines, respectively, vs. methyl position). (b-c) Linear correlation plots of (b)  $R_L(\text{CHD}_2)$  rates (x-axis) vs.  $R(D_Z) + R(3D_Z^2 - 2)$  (CH<sub>2</sub>D) (y-axis) and (c)  $R_{4Q}(\text{CHD}_2)$  (x-axis) vs.  $2R(D_+^2)$  (CH<sub>2</sub>D) (y-axis) for 29 methyl groups of ubiquitin. Three residues with large errors in the measurements (> 6 %) have been eliminated from the plots in (b-c).

**Figure S3**

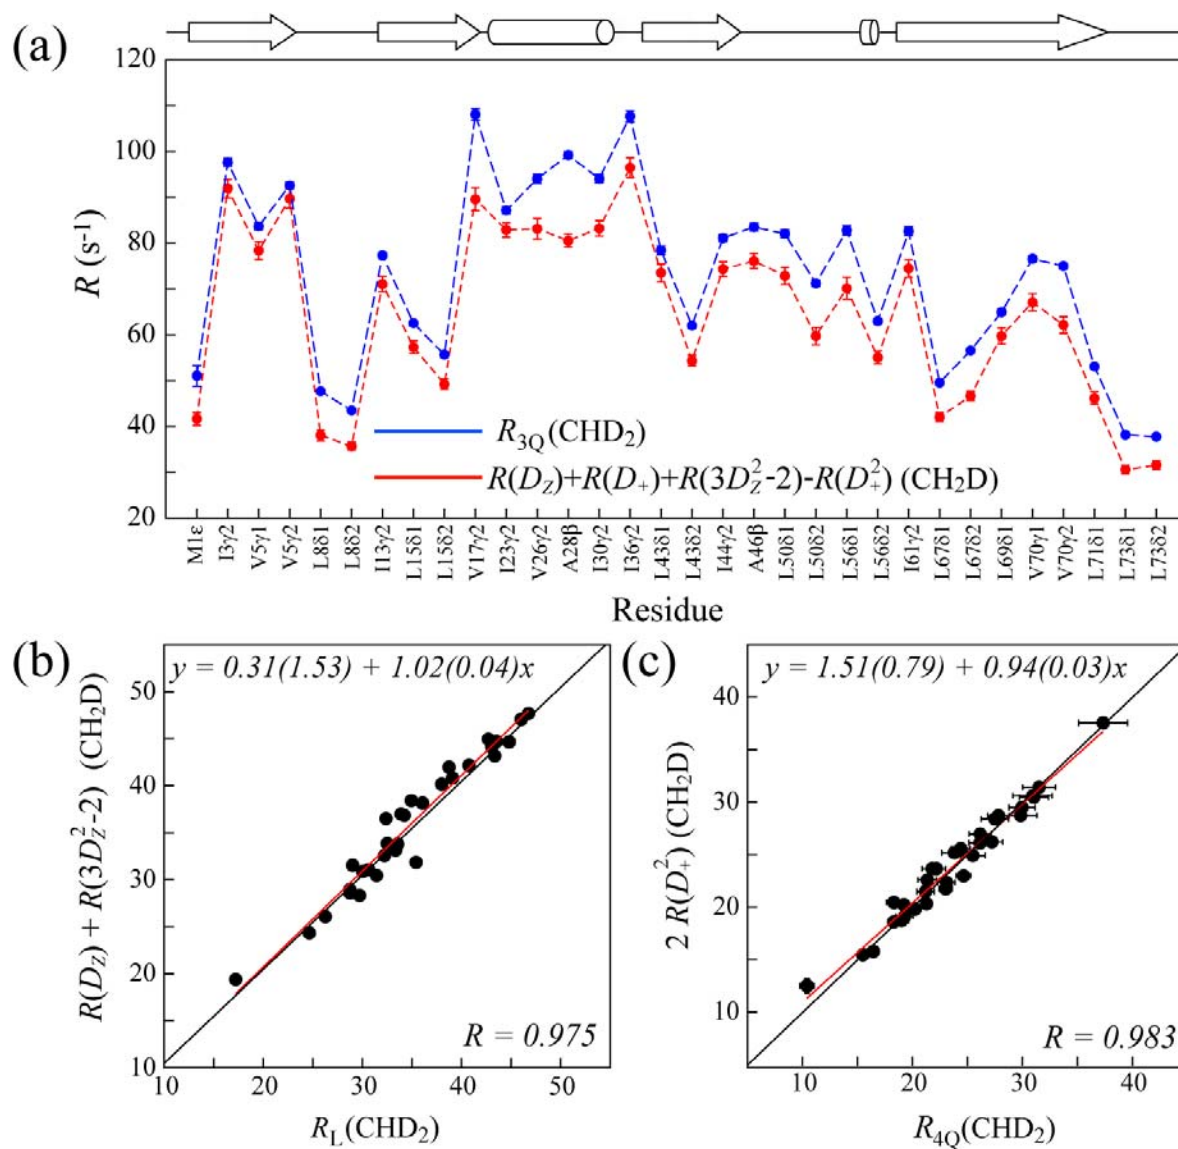

**Figure S3.** (a) All <sup>2</sup>H relaxation rates measured <sup>13</sup>CHD<sub>2</sub> methyl groups of ubiquitin at 40°C satisfy the consistency relations. (a)  $R_{3Q}(\text{CHD}_2) < R(D_Z) + R(D_+) + R(3D_Z^2 - 2) - R(D_+^2)$  (CH<sub>2</sub>D) (shown with red and blue circles/lines, respectively vs. methyl position). (b-c) Linear correlation plots of (b)  $R_L(\text{CHD}_2)$  rates (x-axis) vs.  $R(D_Z) + R(3D_Z^2 - 2)$  (CH<sub>2</sub>D) (y-axis) and (c)  $R_{4Q}(\text{CHD}_2)$  (x-axis) vs.  $2R(D_+^2)$  (CH<sub>2</sub>D) (y-axis) for 31 methyl groups in ubiquitin. 1 residue has been eliminated from the plots in (b-c) due to very high errors in the extracted relaxation rates.

**Figure S4**

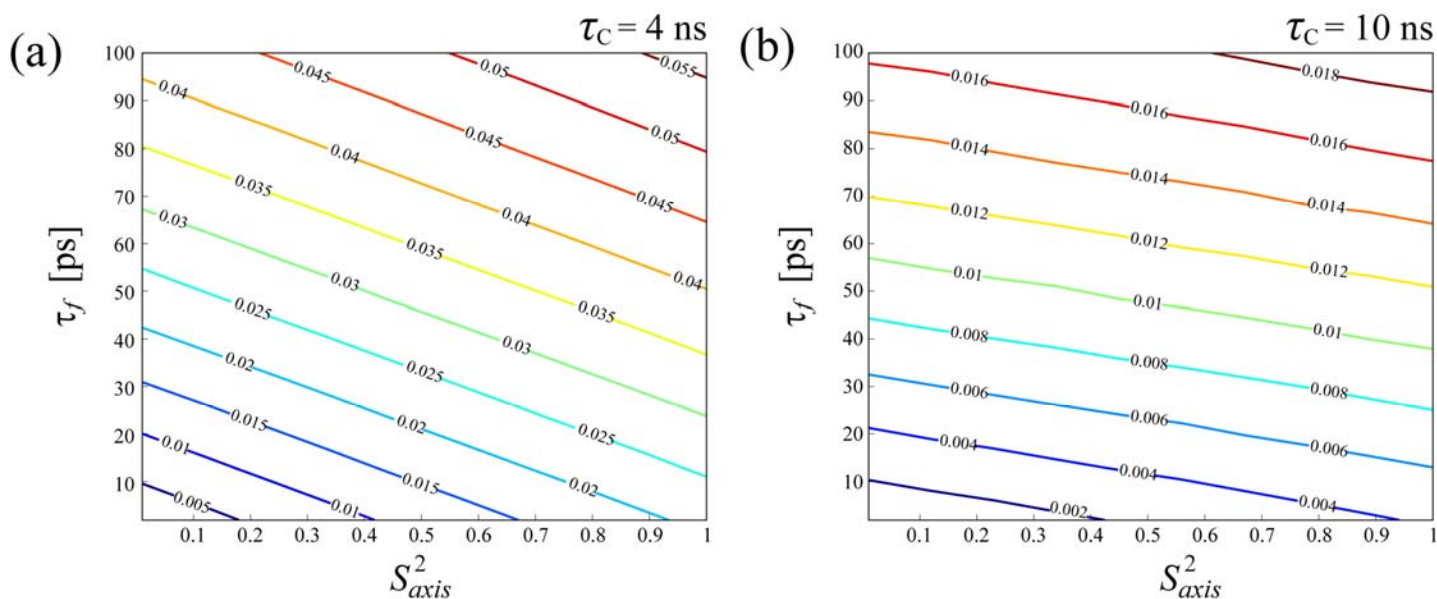

**Figure S4.** Contour plots showing simulated absolute differences between synthetic- $[R_L; R_2(\text{CHD}_2)]$ -derived and input  $S^2_{axis}$  values ( $S^2_{axis}(\text{CHD}_2) - S^2_{axis}$ ) as a function of  $(S^2_{axis}; \tau_f)$  for the global isotropic molecular reorientation correlation times  $(\tau_C)$  of (a) 4 ns; (b) 10 ns. The  $R_2(\text{CHD}_2)$  rates have been simulated as described in the Supporting Information and best-fit to  $R(D_+; \text{CH}_2\text{D}) = (1/80)(2\pi QCC)^2[9J(0) + 15J(\omega_D) + 6J(2\omega_D)]$ , while  $R_L(\text{CHD}_2)$  have been fit to  $(3/40)(2\pi QCC)^2[4J(\omega_D) + 4J(2\omega_D)] = R(3D_Z^2 - 2; \text{CH}_2\text{D}) + R(D_Z; \text{CH}_2\text{D})$ .

**Figure S5**

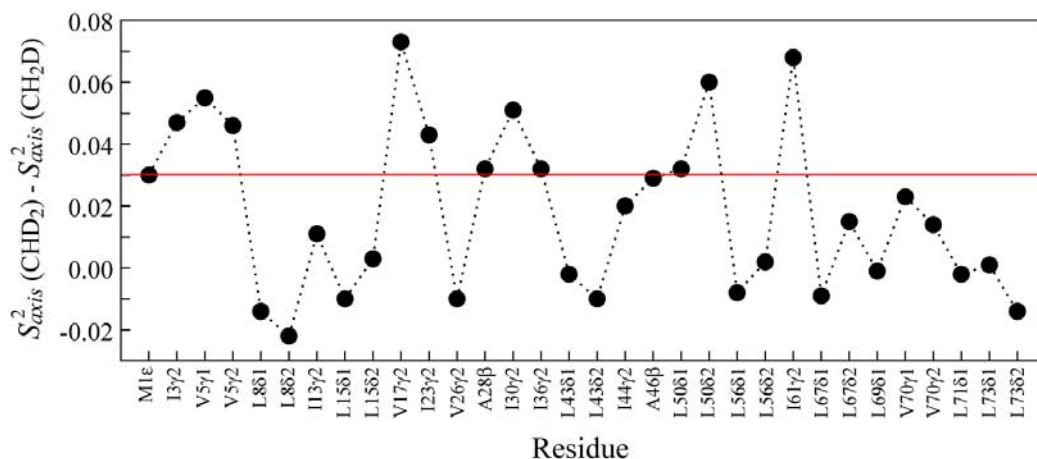

**Figure S5.** The differences between the  $[R_2, R_L(\text{CHD}_2)]$ -derived and  $[D_+, D_Z(\text{CH}_2\text{D})]$ -derived  $S^2_{axis}$  values in ubiquitin at 40°C  $[S^2_{axis}(\text{CHD}_2) - S^2_{axis}(\text{CH}_2\text{D})]$  plotted versus methyl-containing residue numbers. The approximate position of the average absolute deviation  $[S^2_{axis}(\text{CHD}_2) - S^2_{axis}(\text{CH}_2\text{D})]$  predicted from simulations for  $\tau_C = 4$  ns is shown with horizontal red line.

**Figure S6**

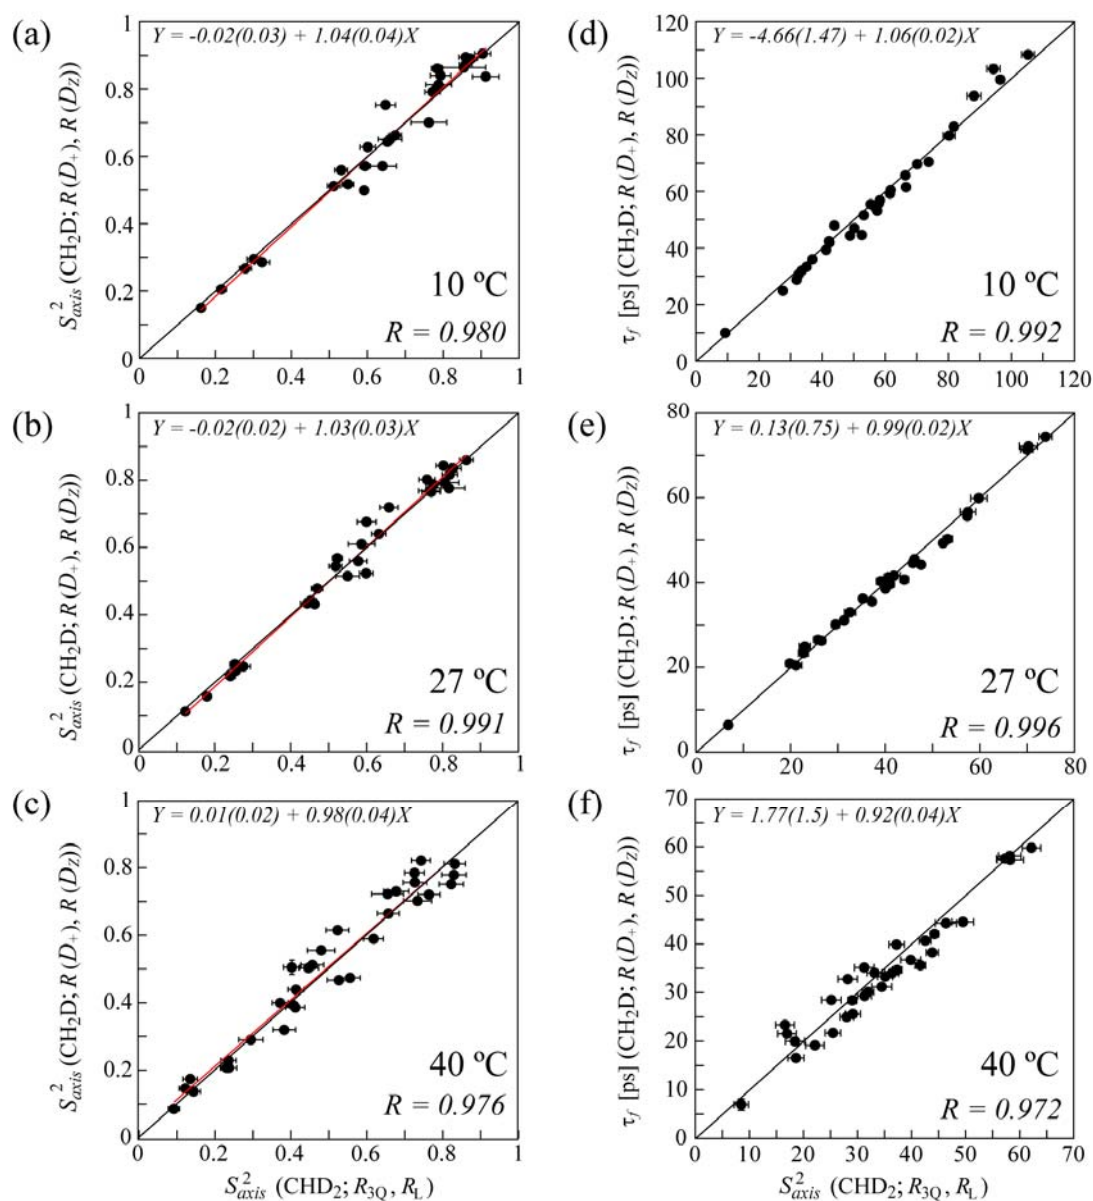

**Figure S6.** Linear correlation plots of **(a-c)**  $[R_{3Q}, R_L(\text{CHD}_2)]$ -derived  $S^2_{axis}$  (x-axis) vs.  $[R(D_+, D_Z; \text{CH}_2\text{D})]$ -derived  $S^2_{axis}$  (y-axis) at 10, 27 and 40 °C; **(d-f)**  $[R_{3Q}, R_L(\text{CHD}_2)]$ -derived  $\tau_f$  values (x-axis) vs.  $[R(D_+, D_Z; \text{CH}_2\text{D})]$ -derived  $\tau_f$  (y-axis) at 10, 27 and 40 °C. Linear regression parameters are shown for each plot along with Pearson correlation coefficients,  $R$ . Solid diagonal lines correspond to  $y = x$ .



**Figure S7**

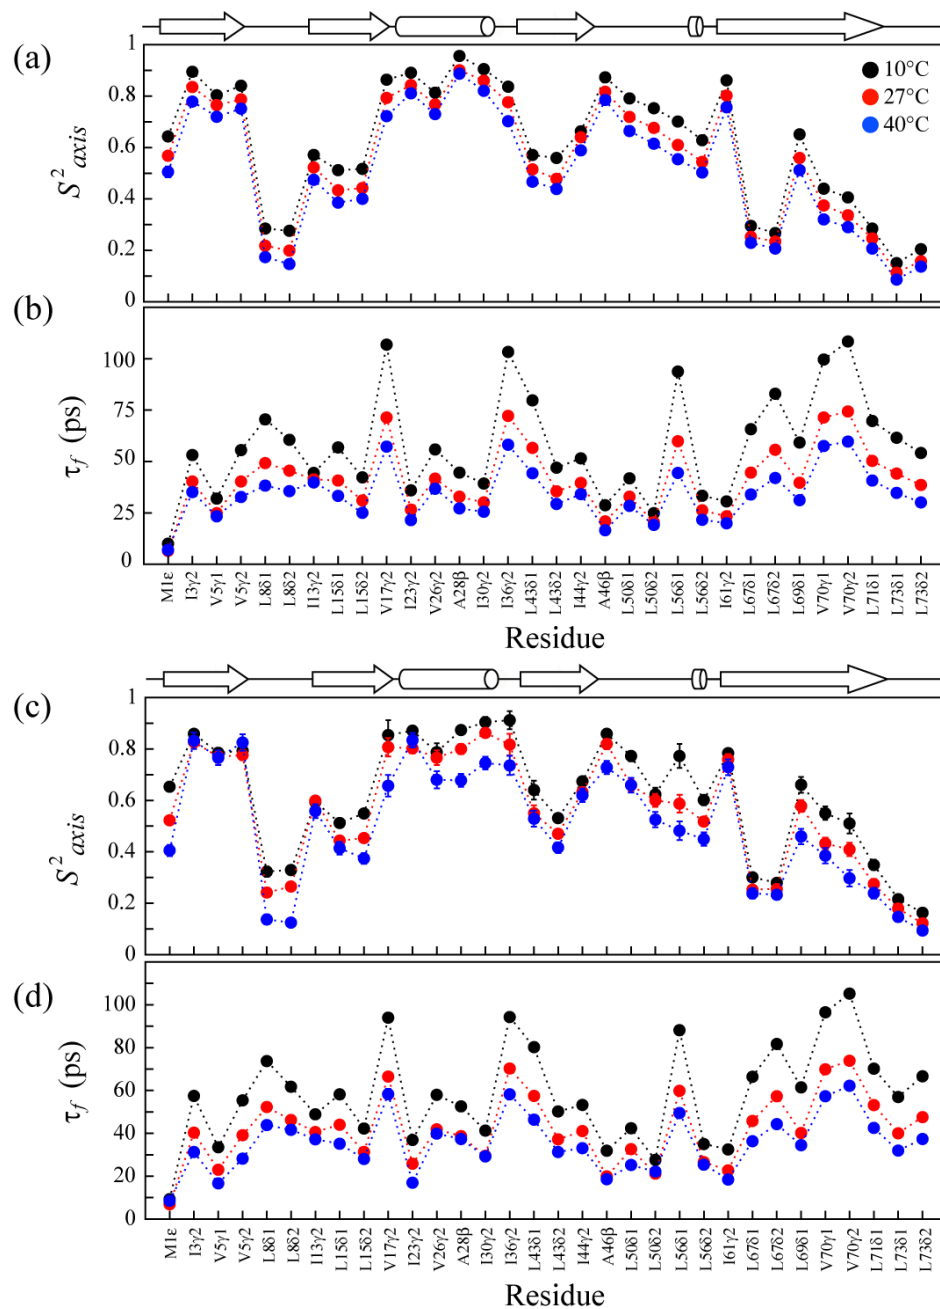

**Figure S7.** Comparisons of  $S^2_{axis}$  and  $\tau_f$  values obtained for 32 methyl groups of ubiquitin at 10°C (black circles), 27°C (red circles) and 40°C (blue circles): (a)  $[R(D_+, D_Z; CH_2D)]$ -derived  $S^2_{axis}$ , (b)  $[R(D_+, D_Z; CH_2D)]$ -derived  $\tau_f$  values (ps); (c)  $[(R_{3Q}, R_L; CHD_2)]$ -derived  $S^2_{axis}$  and (d)  $[(R_{3Q}, R_L; CHD_2)]$ -derived  $\tau_f$  values.

**Figure S8**

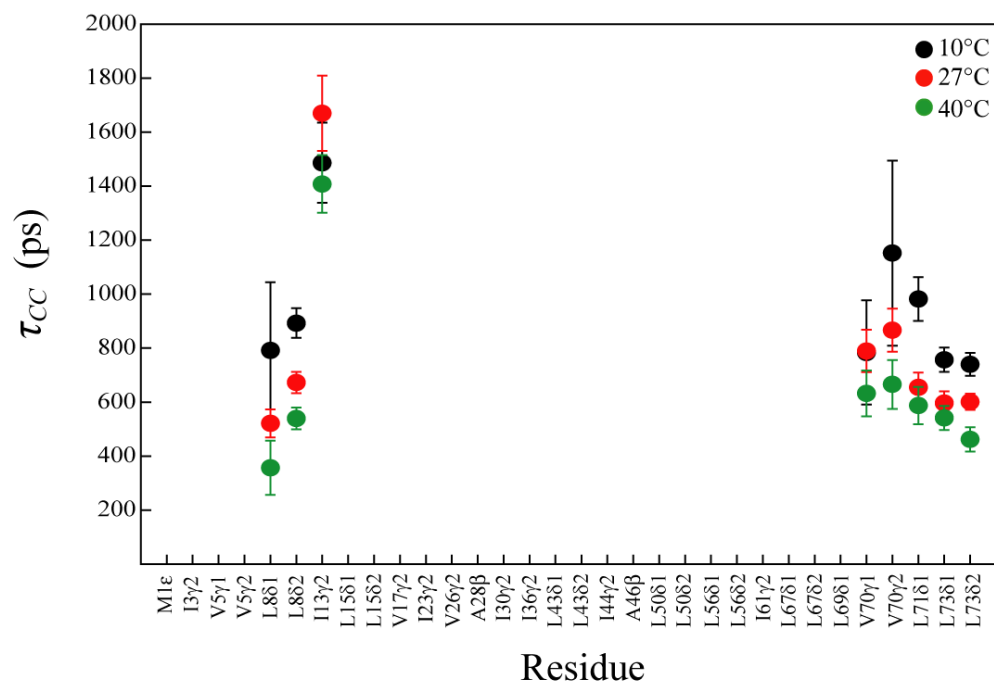

**Figure S8.** Temperature dependence of the time-scales of slow methyl axis motions/rotameric jumps ( $\tau_{CC}$ ; ps) for the subset of methyl groups of ubiquitin that have statistically significant reduction in reduced  $\chi^2$  when five  $^2\text{H}$  relaxation rates (see main text) are best-fit to the spectral density function in eq. 2b. The values of  $\tau_{CC}$  are shown at 10°C (black circles), 27°C (red circles) and 40°C (green circles).

## Supplementary References

- (1) Mittermaier, A.; Kay, L. E. *J. Am. Chem. Soc.* **1999**, *121*, 10608.
- (2) Lipari, G.; Szabo, A. *J. Am. Chem. Soc.* **1982**, *104*, 4559.
- (3) Woessner, D. E. *J. Chem. Phys.* **1962**, *37*, 647.
- (4) Skrynnikov, N. R.; Millet, O.; Kay, L. E. *J. Am. Chem. Soc.* **2002**, *124*, 6449.
